# Supplementary material
Source: MDPI journal article supplement (https://www.mdpi.com/1424-8247/17/3/266)
Supplement: s1 [file s1]

## Supplementary Information

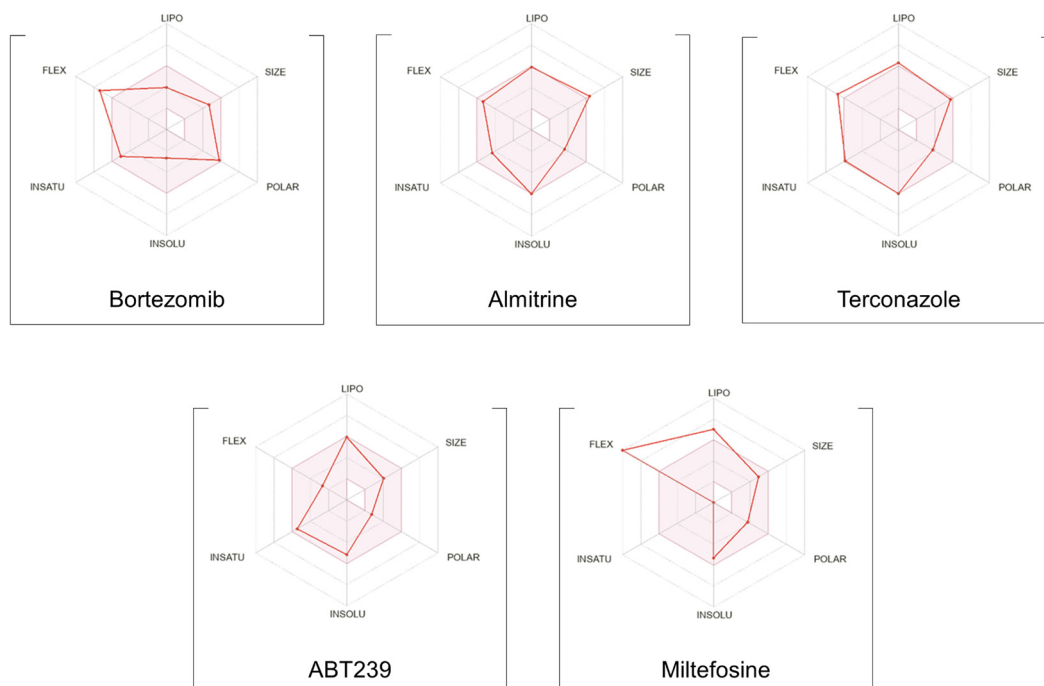

Supplementary Figure S1. Bioavailability Radar appraisal of drug-likeness of the selected molecules. The pink area represents the optimal range for each properties (lipophilicity: XLOGP3 between -0.7 and +5.0, size: MW between 150 and 500g/mol, polarity: TPSA between 20 and 130Å<sup>2</sup>, solubility: log S not higher than 6, saturation: fraction of carbons in the sp<sup>3</sup> hybridization not less than 0.25, and flexibility: no more than 9 rotatable bonds).
